# Supplementary material for: Synthetic routes toward the trisaccharide related to the lipopolysaccharide of Burkholderia sp. HKI-402 (B4)
Source: Royal Society of Chemistry journal article supplement (doi:10.1039/c4ra03954h), 2014-01-01

## **ELECTRONIC SUPPLEMENTARY INFORMATION**

### **Synthetic Routes Toward the Trisaccharide Related to the Lipopolysaccharide of *Burkholderia sp.* HKI-402 (B4)**

Nabamita Basu, Mana Mohan Mukherjee, Rina Ghosh\*

*Department of Chemistry, Jadavpur University, Kolkata 700 032, India.*

*Fax: +91-33-2414-6266*

E-mail: ghoshrina@yahoo.com; [ghosh\\_rina@hotmail.com](mailto:ghosh_rina@hotmail.com)

#### **Table of Contents**

|                                         |             |
|-----------------------------------------|-------------|
| <b>General Experimental Procedure</b>   | <b>S-1</b>  |
| <b><sup>1</sup>H NMR spectra of 6</b>   | <b>S-2</b>  |
| <b><sup>13</sup>C NMR spectra of 6</b>  | <b>S-3</b>  |
| <b><sup>1</sup>H NMR spectra of 20</b>  | <b>S-4</b>  |
| <b><sup>1</sup>H NMR spectra of 21</b>  | <b>S-5</b>  |
| <b><sup>13</sup>C NMR spectra of 21</b> | <b>S-6</b>  |
| <b><sup>1</sup>H NMR spectra of 22</b>  | <b>S-7</b>  |
| <b><sup>13</sup>C NMR spectra of 22</b> | <b>S-8</b>  |
| <b><sup>1</sup>H NMR spectra of 2</b>   | <b>S-9</b>  |
| <b><sup>13</sup>C NMR spectra of 2</b>  | <b>S-10</b> |
| <b>COSY spectra of 2</b>                | <b>S-11</b> |
| <b>HSQC spectra of 2</b>                | <b>S-12</b> |
| <b>HMBC spectra of 2</b>                | <b>S-13</b> |
| <b><sup>1</sup>H NMR of 1</b>           | <b>S-14</b> |
| <b><sup>13</sup>C NMR of 1</b>          | <b>S-15</b> |
| <b>DEPT spectra of 1</b>                | <b>S-16</b> |
| <b>COSY spectra of 1</b>                | <b>S-17</b> |
| <b>HSQC spectra of 1</b>                | <b>S-18</b> |

## General Experimental Procedure

All reactions were done in argon atmosphere. All glasswares were stored in the oven and were flame-dried prior to use. Dry  $\text{CH}_2\text{Cl}_2$  was obtained by distillation over  $\text{P}_2\text{O}_5$ . All reagents and solvents were commercially available. Reagents were used without further purification and solvents were distilled prior to use. Column chromatography and flash column chromatography were performed using 60-120 and 230-400 mesh silica, respectively. Petroleum ether (PE, 60-80°C) was used for chromatographic purpose. Melting points were recorded in Toshniwal, India melting point apparatus and are uncorrected. NMR spectra were recorded on Bruker DPX NMR spectrometer operating at 300 MHz and 500 MHz for  $^1\text{H}$ -NMR and at 75 MHz and 125 MHz for  $^{13}\text{C}$ -NMR in  $\text{CDCl}_3$ . Assignments were obtained using  $^1\text{H}$  - $^1\text{H}$  COSY, and  $^1\text{H}$  - $^{13}\text{C}$  HSQC experiments. HRMS data were recorded on a Q-tof-Micro mass spectrometer by electron spray ionization method. Specific rotations were measured on Jasco J-815 spectrometer. Rotations were determined using a cell of 1 dm-path length. Data are reported as follows:  $[\alpha]_{\text{D}}^{\text{temp}}$ , concentration ( $c$  in g/100 mL) and solvent.

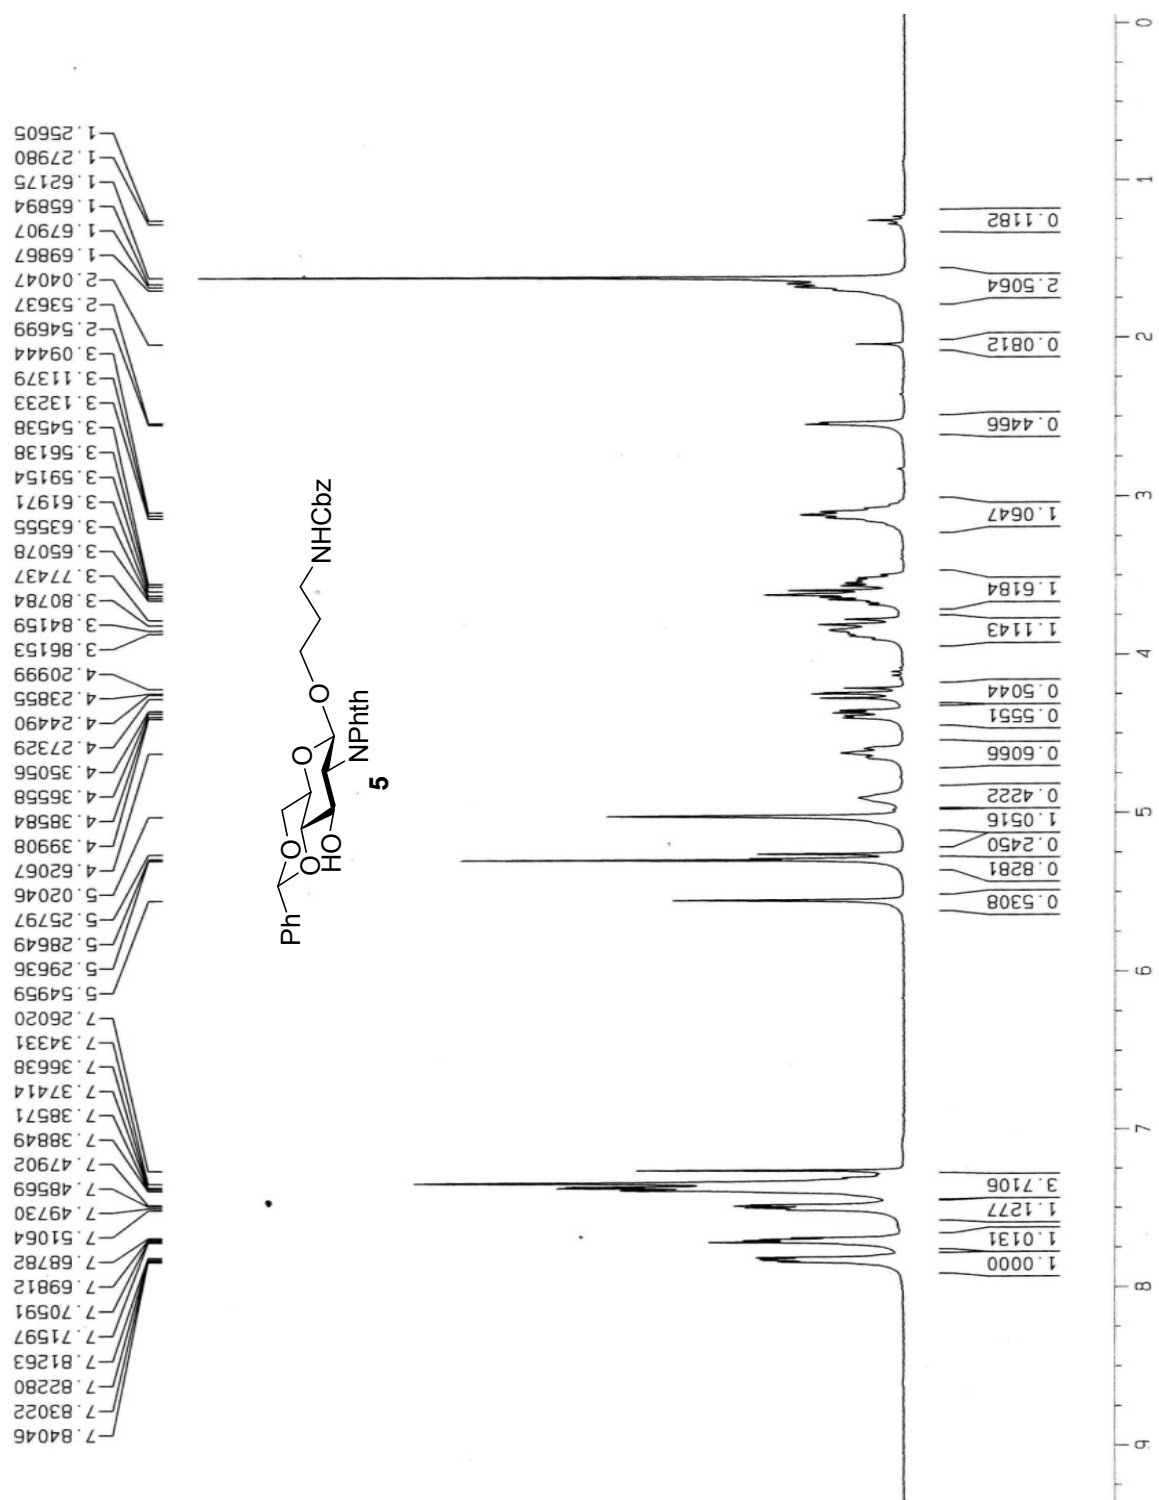

Current Data Parameters  
 NAME SM-40335-13C  
 EXPNO 1  
 PROCNO 1

F2 - Acquisition Parameters  
 Date\_ 20100128  
 Time 18.21  
 INSTRUM spect  
 PROBHD 5 mm Multinuc1  
 PULPROG zgpg30  
 TD 65536  
 SOLVENT CD3CN  
 NS 708  
 DS 4  
 SWH 18839.395 Hz  
 FIDRES 0.288992 Hz  
 AQ 1.7302004 sec  
 RG 9195.2  
 DM 26.400 usec  
 DE 6.00 usec  
 TE 297.2 K  
 D1 2.00000000 sec  
 d11 0.03000000 sec  
 DELTA 1.89999998 sec  
 MCREST 0.00000000 sec  
 MCNRK 0.01500000 sec

===== CHANNEL f1 =====  
 NUC1 13C  
 P1 11.75 usec  
 PL1 0.00 dB  
 SF01 75.4763276 MHz

===== CHANNEL f2 =====  
 CPDPRG2 waltz16  
 NUC2 1H  
 P2 100.00 usec  
 PL2 -6.00 dB  
 PL12 8.00 dB  
 PL13 12.00 dB  
 SF02 300.1312005 MHz

F2 - Processing parameters  
 S1 32768  
 SF 75.4677441 MHz  
 WDM EM  
 SSB 0  
 LB 1.00 Hz  
 GB 0  
 PC 1.40

1D NMR plot parameters  
 CX 20.00 cm  
 CY 5.75 cm  
 FJP 211.940 ppm  
 F1 15994.61 Hz  
 F2P -7.196 ppm  
 F2 -543.05 Hz  
 PPMCM 10.95677 ppm/cm

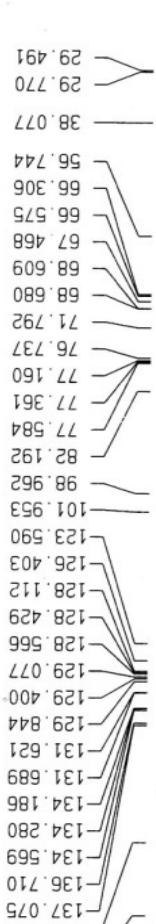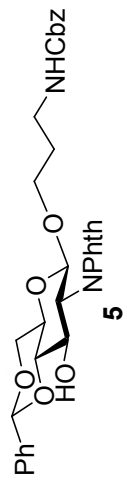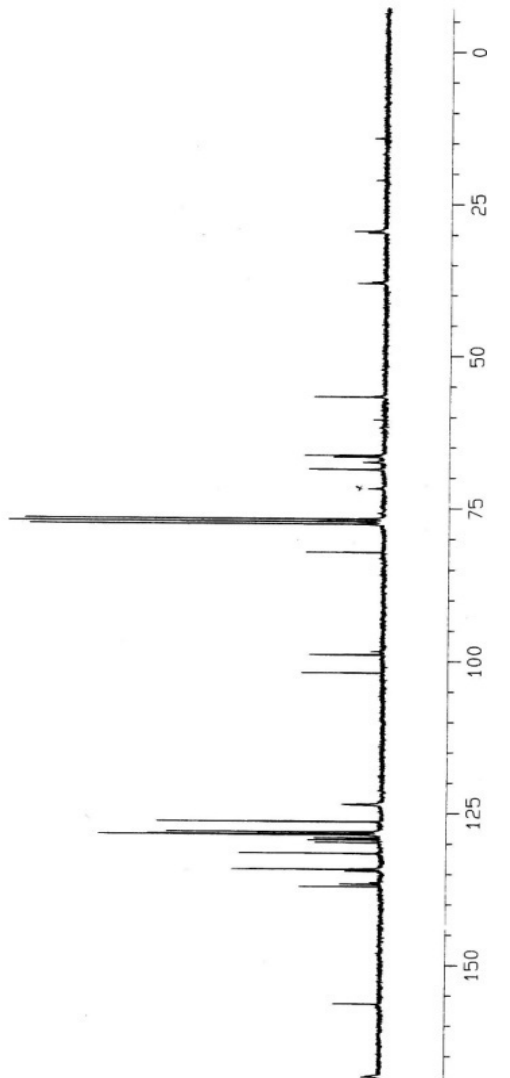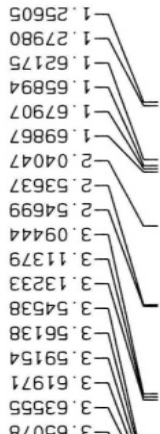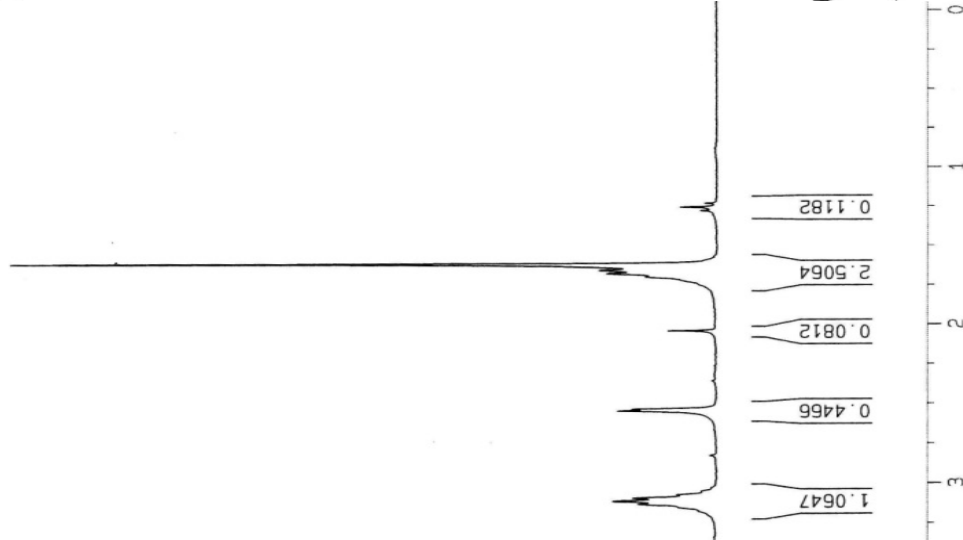



7.708  
 7.673  
 7.658  
 7.510  
 7.497  
 7.484  
 7.469  
 7.362  
 7.350  
 7.342  
 7.325  
 7.316  
 7.311  
 7.302  
 7.297  
 7.290  
 7.276  
 7.261  
 7.219  
 5.537  
 5.261  
 5.244  
 5.068  
 5.035  
 4.820  
 4.798  
 4.652  
 4.630  
 4.613  
 4.569  
 4.546  
 4.528  
 4.506  
 4.457  
 4.434  
 4.394  
 4.380  
 4.372  
 4.333  
 4.316  
 4.313  
 4.296  
 3.960  
 3.948  
 3.938  
 3.930  
 3.918  
 3.912  
 3.849  
 3.807  
 3.787  
 3.677  
 3.661  
 3.647  
 3.535  
 3.525  
 3.366  
 3.347  
 3.328  
 3.123  
 3.109  
 3.096  
 1.684  
 1.670  
 1.656  
 1.642  
 1.610  
 0.809  
 0.797

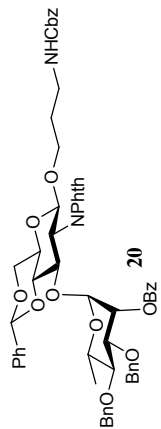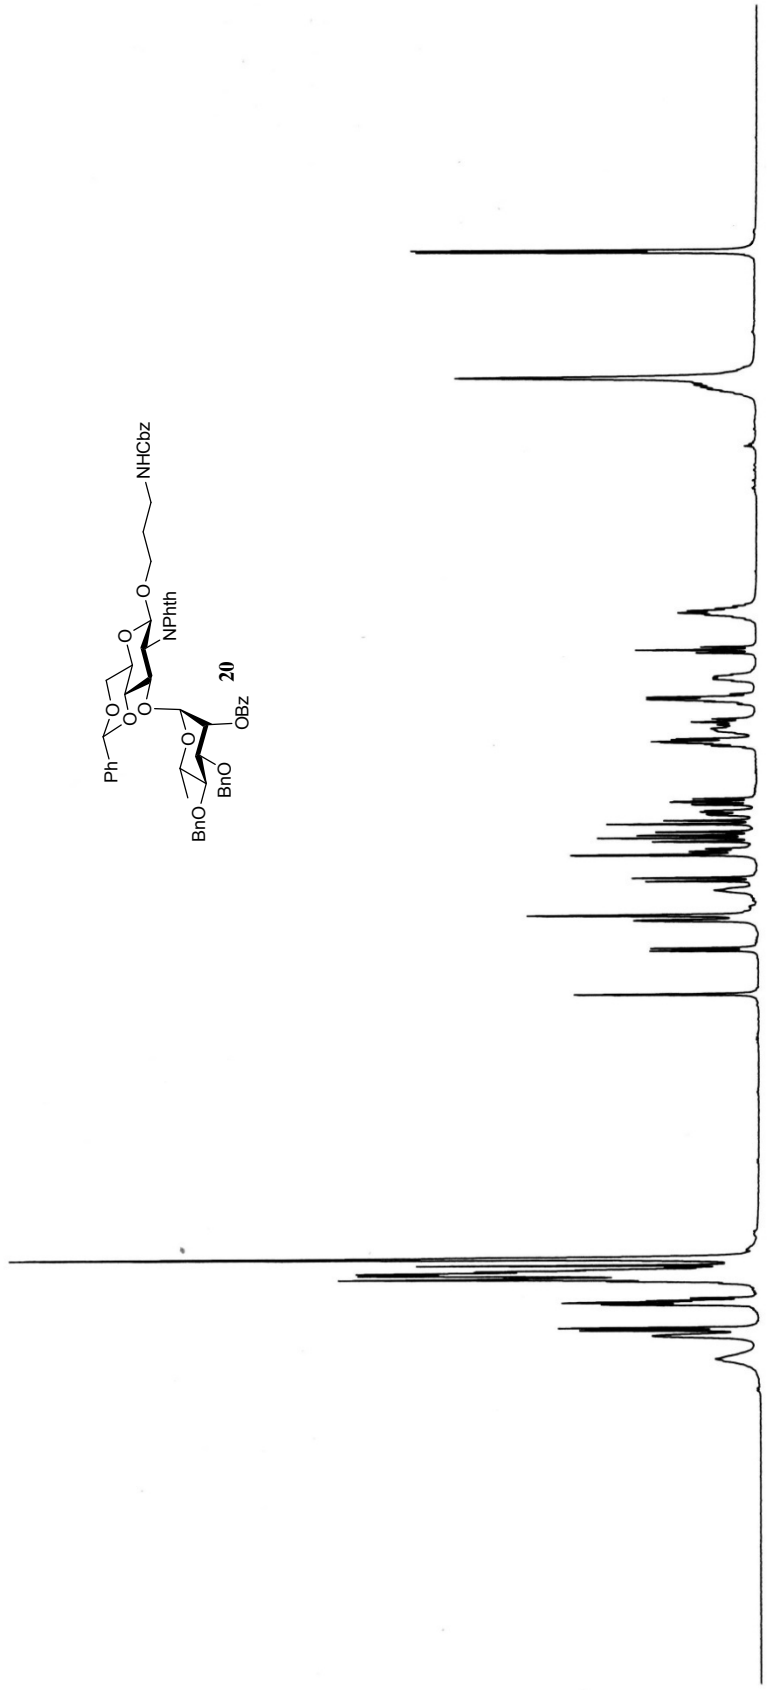

9.5  
 9.0  
 8.5  
 8.0  
 7.5  
 7.0  
 6.5  
 6.0  
 5.5  
 5.0  
 4.5  
 4.0  
 3.5  
 3.0  
 2.5  
 2.0  
 1.5  
 1.0  
 0.5  
 0.0  
 ppm

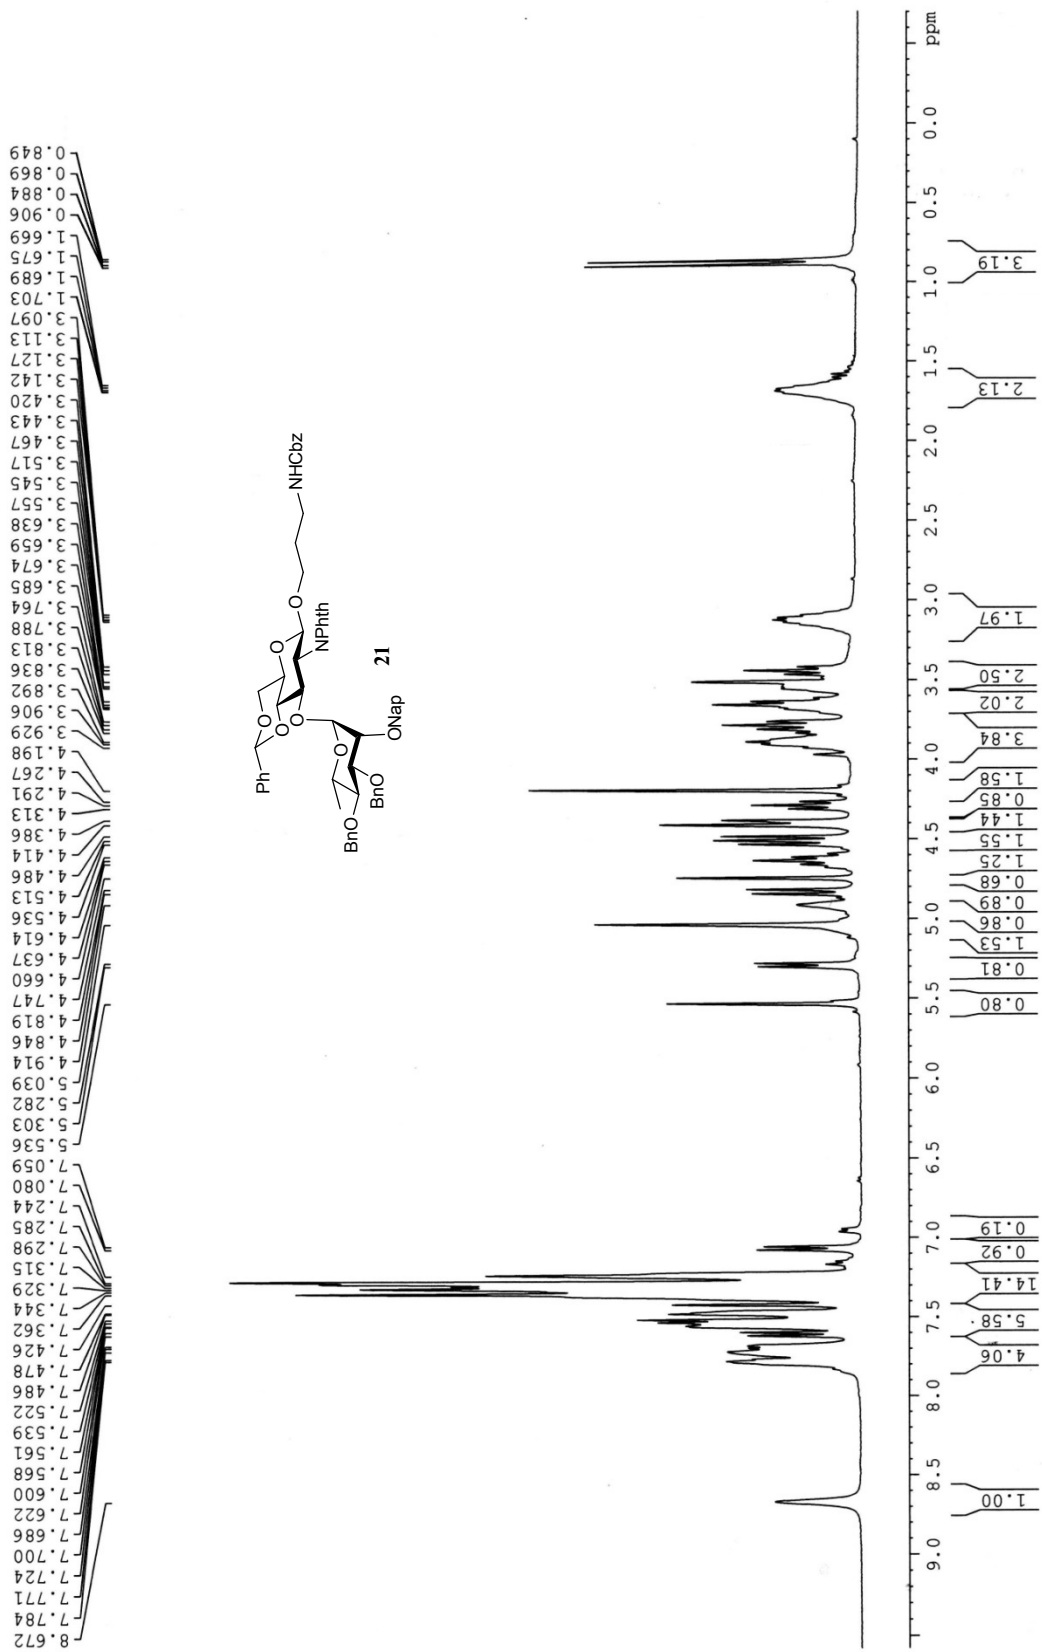

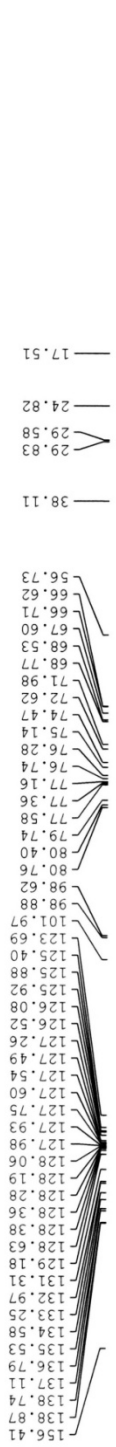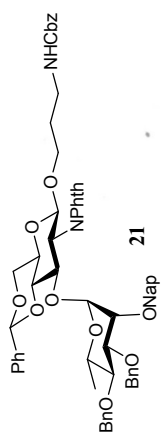

Current Data Parameters  
 SADA-8B04-13C  
 EXPNO 1  
 PROCNO 1

F2 - Acquisition Parameters  
 Date\_ 20140710  
 Time 12.39  
 INSTRUM spect  
 PROBHD 5 mm PABBO BB  
 PULPROG zgpg30  
 TD 32768  
 SOLVENT CDC13  
 NS 1537  
 SH 22727.273 Hz  
 FIDRES 0.693581 Hz  
 AQ 0.7208960 sec  
 RG 210.78  
 DW 22.000 usec  
 DE 6.50 usec  
 TE 30.000000 sec  
 D1 2.00000000 sec  
 D11 0.03000000 sec  
 TD0 1

===== CHANNEL f1 =====  
 SF01 75.475294 MHz  
 NUC1 13C  
 PL 9.25 usec  
 PLW1 34.00000000 W

===== CHANNEL f2 =====  
 SF02 300.132091 MHz  
 NUC2 1H  
 PL 9.25 usec  
 PLW2 34.00000000 W  
 CFPDPRG2 waltz16  
 PCPD2 90.00 usec  
 PLM2 6.99840021 W  
 PLM12 0.17545000 W  
 PLM13 0.14211001 W

F2 - Processing parameters  
 SI 32768  
 SF 75.4677392 MHz  
 MDW 0  
 SSB 0  
 GB 0  
 PC 0 1.40



0.695  
 0.716  
 1.521  
 1.544  
 1.564  
 1.585  
 1.606  
 2.997  
 3.017  
 3.030  
 3.116  
 3.146  
 3.178  
 3.543  
 3.571  
 3.588  
 3.603  
 3.607  
 3.613  
 3.619  
 3.631  
 3.642  
 3.660  
 3.671  
 3.683  
 3.716  
 3.751  
 3.814  
 3.835  
 3.846  
 4.146  
 4.175  
 4.180  
 4.209  
 4.283  
 4.297  
 4.317  
 4.331  
 4.385  
 4.422  
 4.454  
 4.461  
 4.527  
 4.555  
 4.560  
 4.644  
 4.681  
 4.949  
 5.168  
 5.197  
 5.443  
 7.120  
 7.126  
 7.137  
 7.144  
 7.152  
 7.172  
 7.184  
 7.192  
 7.201  
 7.209  
 7.226  
 7.233  
 7.238  
 7.244  
 7.250  
 7.254  
 7.258  
 7.269  
 7.284  
 7.288  
 7.299  
 7.406  
 7.413  
 7.432  
 7.438  
 7.630  
 7.640  
 7.648  
 7.658  
 7.750  
 7.760  
 7.768  
 7.778

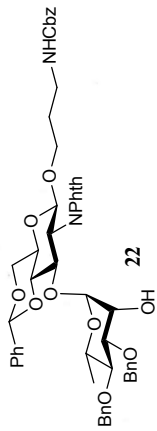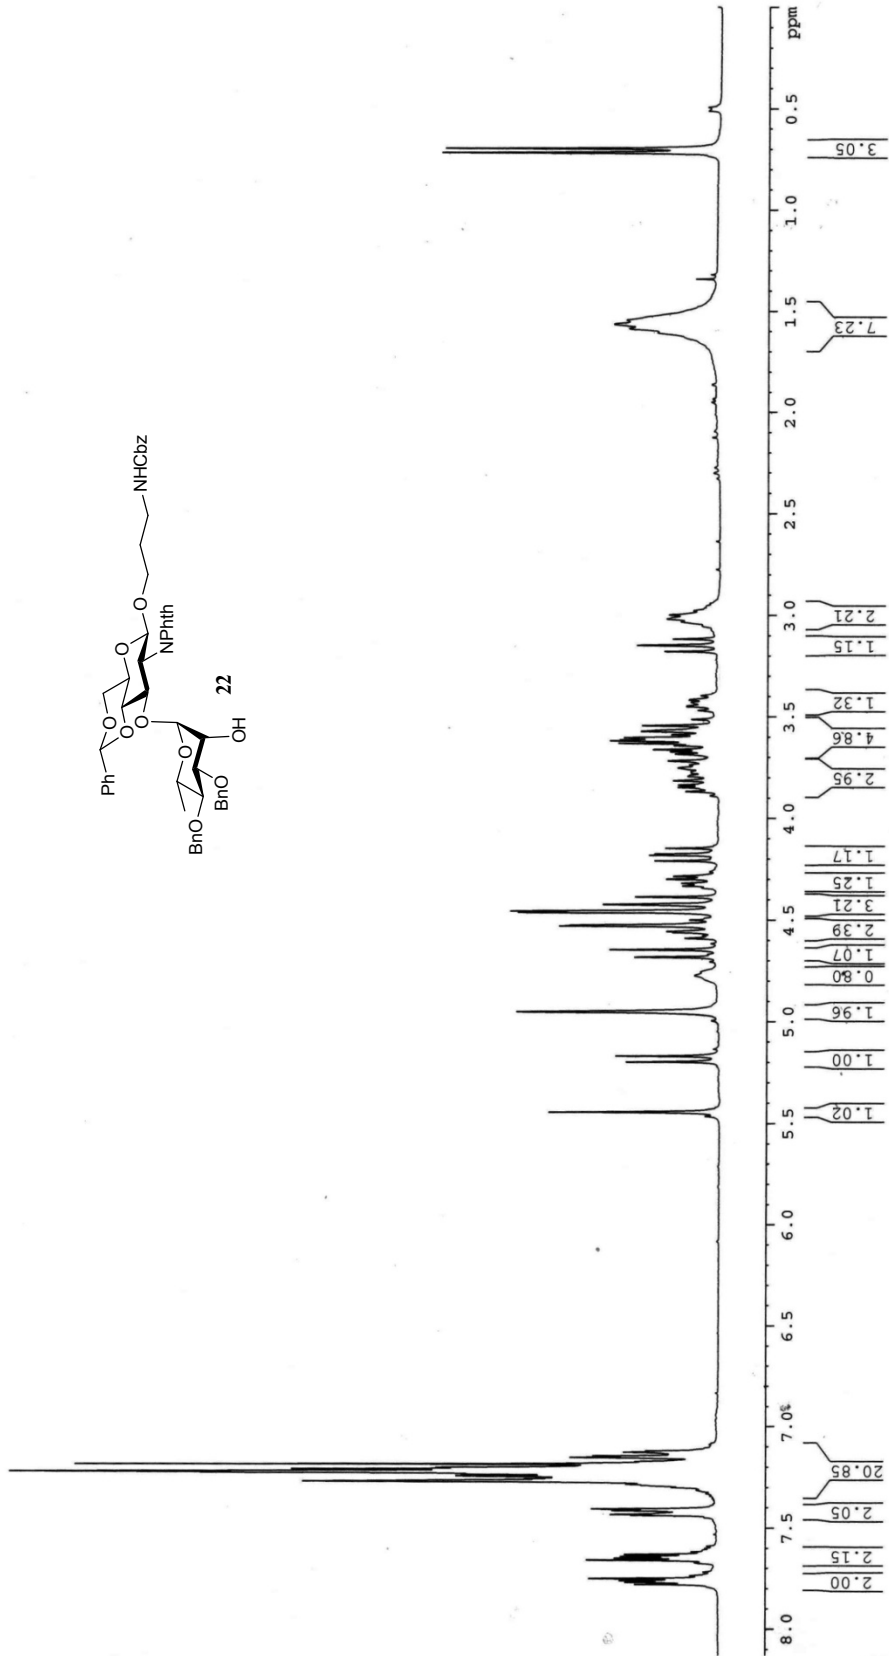

SD-MM07-13C

```

Current Data Parameters
NAME      SD-MM07-13C
EXPNO    1
PROCNO   1
F2 - Acquisition Parameters
Date_    20140710
Time     16
INSTRUM  spect
PROBHD   5 mm PABBO BB-
PULPROG  zgpg30
TD       32768
SOLVENT  CDCl3
NS       1600
DS       4
SWH      22727.273 Hz
FIDRES   0.2708561 Hz
AQ       0.21078 sec
RG       210.78
DM       22.000 usec
DE       6.50 usec
TE       300.2
D1       2.00000000 sec
D11      0.03000000 sec
TD0      1
===== CHANNEL f1 =====
SFO1     75.4752949 MHz
NUC1     13C
P1       9.25 usec
PLW1     34.00000000 W
===== CHANNEL f2 =====
SFO2     300.1312005 MHz
NUC2     13C
P2       9.25 usec
PLW2     34.00000000 W
===== Processing parameters =====
SI       32768
SF       75.4677402 MHz
WDW      EM
SSB      0
LB       1.00 Hz
GB       0
PC       1.40
  
```

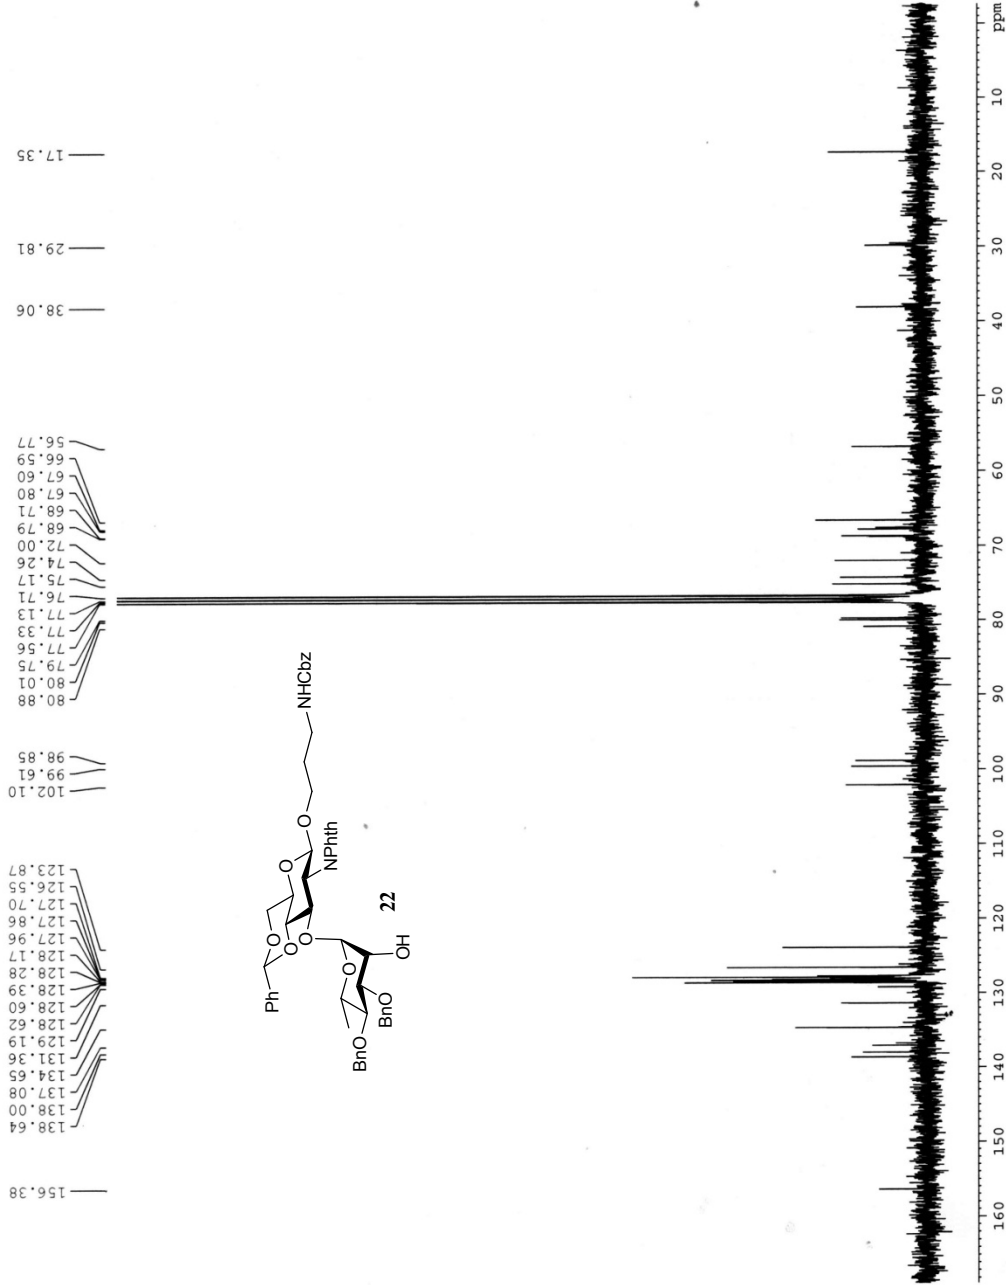

170.085  
169.777  
169.444  
156.262  
138.717  
138.503  
136.989  
134.165  
131.398  
129.111  
128.527  
128.369  
128.254  
128.188  
128.081  
127.954  
127.542  
127.479  
127.405  
126.442  
102.007  
99.705  
99.616  
98.695  
80.717  
79.914  
78.986  
78.088  
77.297  
77.031  
76.781  
75.509  
75.245  
71.866  
71.011  
69.766  
68.791  
68.679  
68.303  
66.588  
66.399  
56.616  
37.966  
29.456  
20.844  
20.798  
20.706  
17.316  
17.138

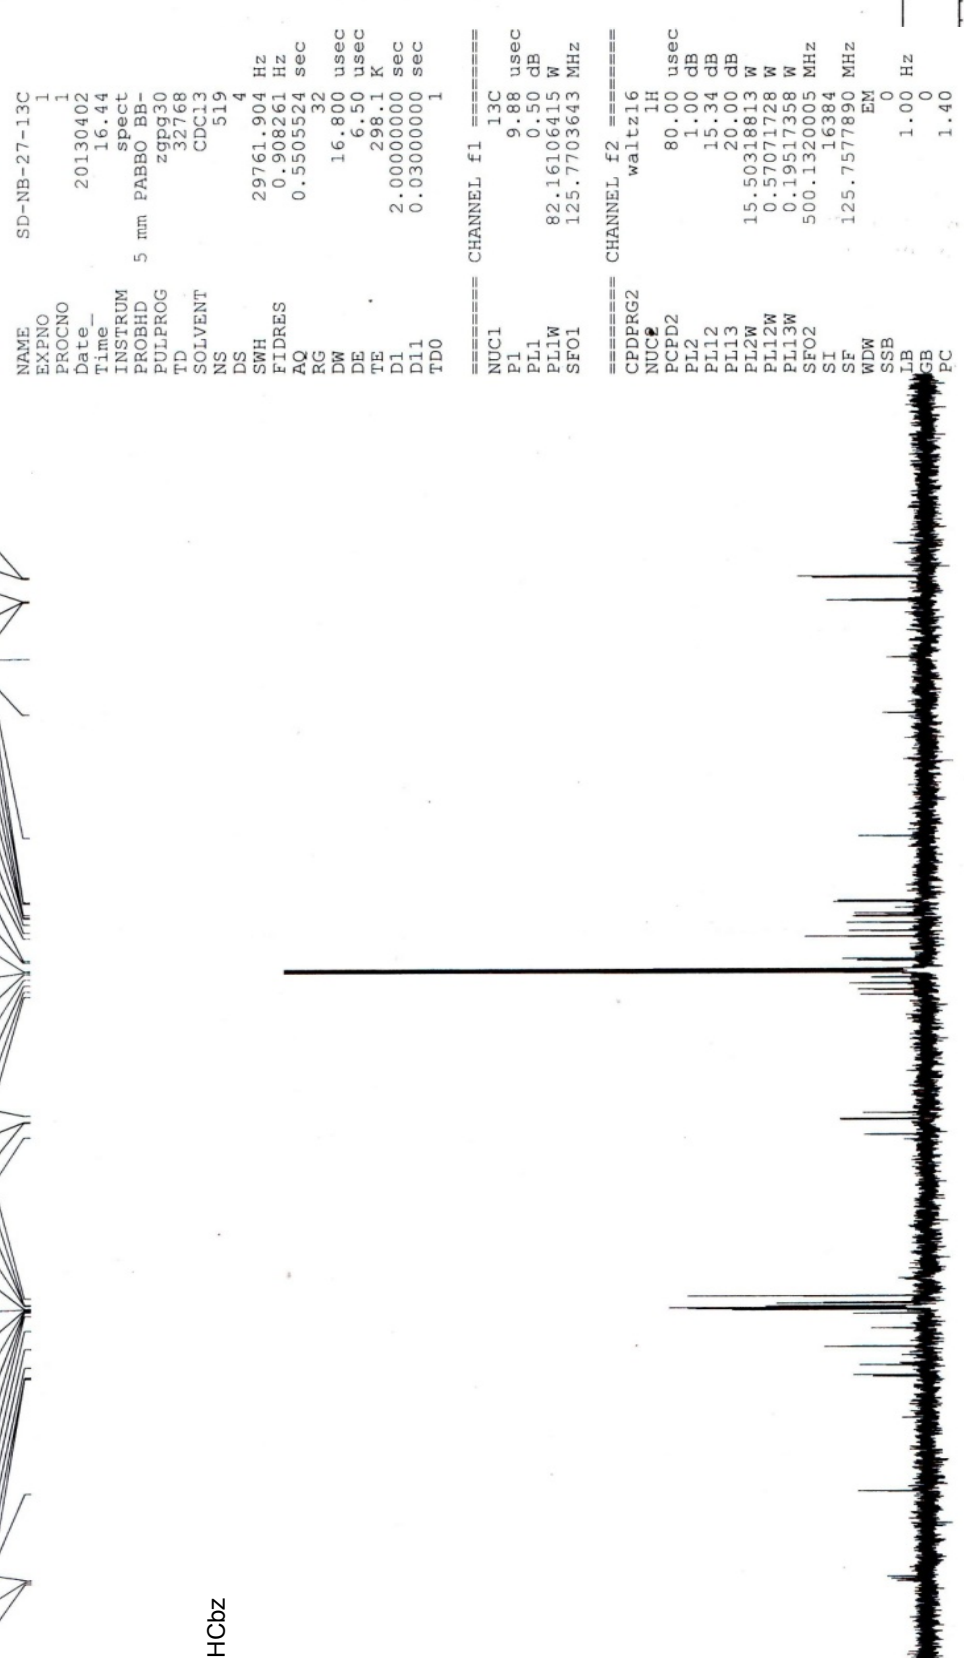

1.00  
1.00  
1.03  
9.29  
0.48  
0.52  
1.00  
1.03  
0.43  
1.05  
0.55  
1.59  
1.11  
0.52  
0.51  
2.15  
1.59  
0.58  
0.51  
0.51  
1.07  
1.47  
1.45  
1.51  
0.14  
0.14  
2.64  
3.01

NAME SD-NB-27-13C  
EXENO 1  
PROCNO 1  
Date 20130402  
Time\_ 16.44  
INSTRUM Spect  
PROBHD 5 mm PABBO BB-  
PULPROG zgpg30  
TD 32768  
SOLVENT CDCl3  
NS 519  
DS 4  
SWH 29761.904 Hz  
FIDRES 0.908261 Hz  
AQ 0.5505524 sec  
RG 32  
DW 16.800 usec  
DE 6.50 usec  
TE 298.1 K  
D1 2.0000000 sec  
D11 0.0300000 sec  
TDO 1

==== CHANNEL f1 =====  
NUC1 13C  
P1 9.88 usec  
PL1 0.50 dB  
PL1W 82.16106415 W  
SF01 125.7703643 MHz

==== CHANNEL f2 =====  
CPDPRG2 waltz16  
NUC2 LH  
PCPD2 80.00 usec  
PL2 1.00 dB  
PL12 15.34 dB  
PL13 20.00 dB  
PL2W 15.50318813 W  
PL12W 0.57071728 W  
PL13W 0.19517358 W  
SF02 500.1320005 MHz  
SI 16384  
SF 125.7577890 MHz  
EM 0  
WDW 0  
SSB 0  
LB 1.00 Hz  
GB 0  
PC 1.40

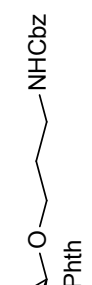



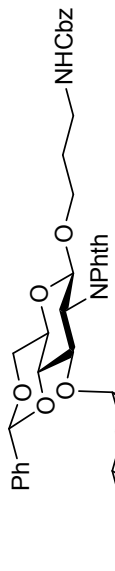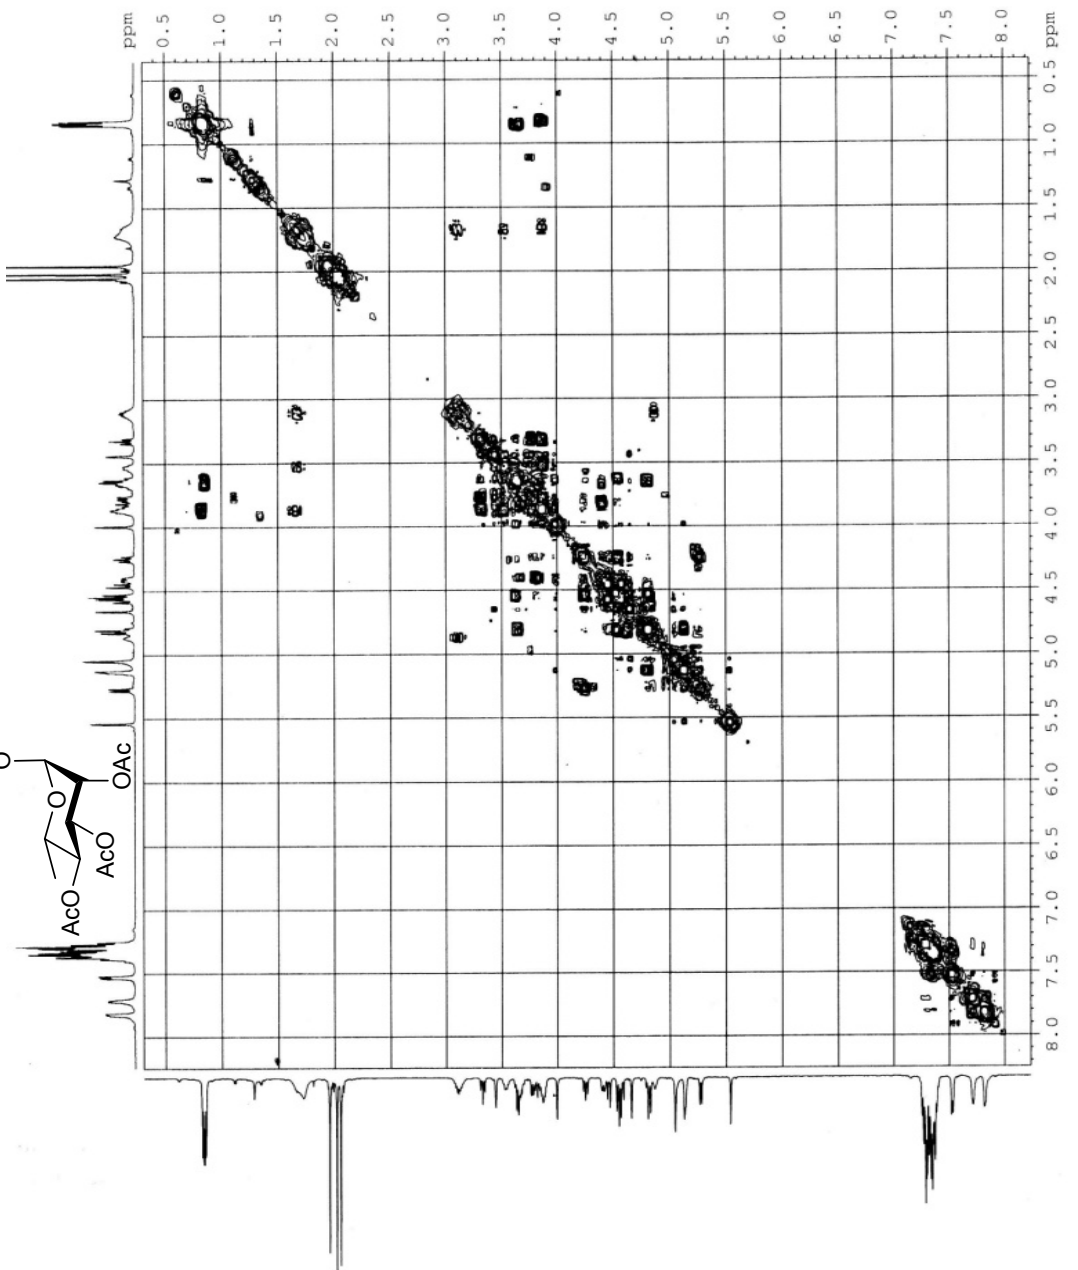

SD-NB-27-cosy (SR)

```

NAME SD-NB-27-cosy
EXNO 9
PROCNO 1
Date_ 20130402
Time 20.14
INSTRUM spect
PROBHD 5 mm PABBO BB-
PULPROG cosygpgf
TD 2048
SOLVENT CDCl3
NS 256
DS 16
SWH 609.615 Hz
FIDRES 2.934382 Hz
AQ 0.1704436 sec
RG 71.8
DE 83.200 usec
TE 298.9 K
D0 0.0000300 sec
D1 1.48689198 sec
D13 0.0000400 sec
D16 0.0002000 sec
IN0 0.00016640 sec

===== CHANNEL f1 =====
NUC1 1H
P0 15.35 usec
P1 15.35 usec
PL1 1.00 dB
PL1W 15.50318813 W
SF01 500.1330008 MHz

===== GRADIENT CHANNEL =====
GPNAM1 SINE.100
GPZ1 10.00 %
P16 1000.00 usec
ND0 1
TD 119
SF01 500.133 MHz
FIDRES 50.501244 Hz
SW 12.016 ppm
FmMODE QF
SI 1024
SF 500.1300000 MHz
WDW SINE
SSB 0
LB 0.00 Hz
GB 0
PC 1.40
SI 1024
MC2 QF
SF 500.1300000 MHz
WDW SINE
SSB 0
LB 0.00 Hz
GB 0

```



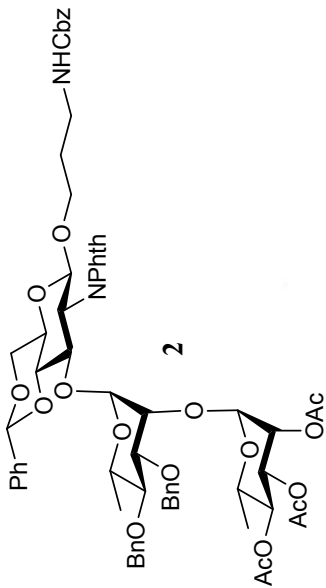

```

NAME SD-NB-27-HSCC
EXPNO 1
PROCNO 2
Date_ 20130403
Time 12.50
INSTRUM spect
PROBHD 5 mm PABBO BR
PULPROG hsqcetp93z
SOLVENT CDCl3
NS 128
DS 4
SWH 6009.615 Hz
FIDRES 5.868765 Hz
AQ 0.0852468 sec
RG 327.5
DM 83.200 usec
DE 6.50 usec
TE 300.2 K
TEST2 145.00298.4
D0 0.0000000 sec
D01 0.0000000 sec
D1 1.5000000 sec
D4 0.0017244 sec
D11 0.0000000 sec
D13 0.0000000 sec
D16 0.0002000 sec
D18 0.0006207 sec
D19 0.0002000 sec
ZGPGFNS 0.0002659 sec

===== CHANNEL f1 =====
NUC1 1H
P1 15.35 usec
P2 30.70 usec
PCPD1 1.00 dB
PL1 1.00 dB
PLAW 15.5018813 W
SFO1 500.1330008 MHz

===== CHANNEL f2 =====
GPOPRG2 gaitp4
NUC2 13C
P3 9.38 usec
P4 19.76 usec
PCPD2 70.00 usec
PL1 1.00 dB
PL2 17.50 dB
PL3 17.50 dB
PL4W 82.16106415 W
SFO2 125.7672208 MHz

===== GRADIENT CHANNEL =====
GPMAX1 SINE.100
GPMAX2 SINE.100
GPMAX3 SINE.100
GPMAX4 SINE.100
GPZ1 90.00
GPZ2 90.00
GPZ3 11.00
GPZ4 10.50
P19 10.50 usec
NDO 600.00 usec
TD 2
ID1 125.7245 MHz
FIDRES 77.000336 Hz
SW 150.000 ppm
STMODE Echo-Antiecho
SF 500.1300091 MHz
GB 0.00 Hz
LB 0.00 Hz
MC2 1.40
SF 125.7577890 MHz
GB 0.00 Hz

```

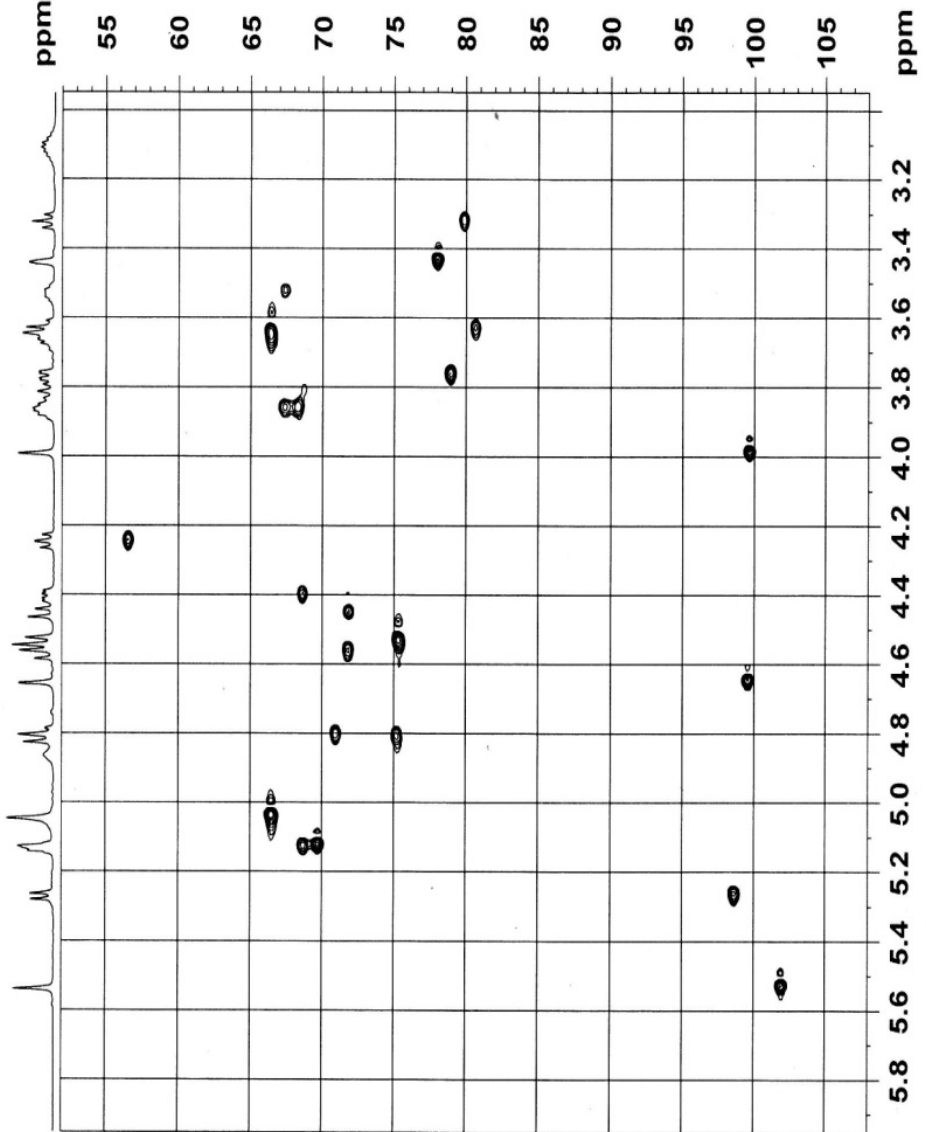





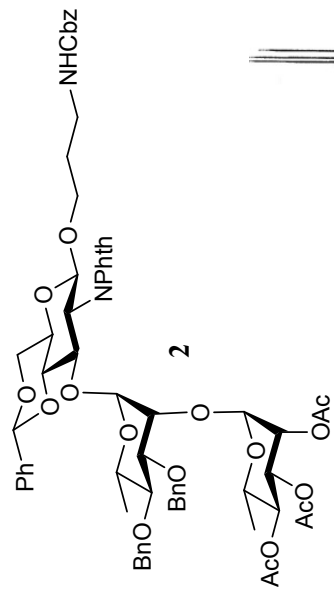

SD-NB-27-HMBC

NAME SD-NB-27-HMBC  
EXPNO 1  
PROCNO 2  
Date\_ 20130527  
Time 20.22  
INSTRUM spect  
PROBHD 5 mm PABBO-8B  
PULPROG hmbcpg1prdgf  
TD 4896  
FIDRES 0.3409372 sec  
AQ 6009.615 Hz  
RG 1.467191 Hz  
DE 83.200 usec  
TE 300.0 K  
DQ 145.000000  
DQ2 0.0000300 sec  
DQ3 1.500000000 sec  
D2 0.00344828 sec  
D6 0.05000000 sec  
D7 0.00000000 sec  
LNO 0.00001895 sec

CHANNEL #1  
NUC1 1H  
P1 15.00 usec  
PL1 30.70 usec  
PL2 1.00 dB  
PLW 15.50318813 W  
SFO1 500.1330008 MHz

CHANNEL #2  
NUC2 13C  
P3 9.88 usec  
PL3 0.50 dB  
PL4 82.1610250 dB  
PL5 125.7709936 MHz  
SFO2 125.7709936 MHz

GRADIENT CHANNEL  
GPMAX1 SINE 100  
GPMAX2 SINE 100  
GPMAX3 SINE 100  
GP21 50.00 %  
GP22 30.00 %  
GP23 40.10 %  
ND0 1000.00 usec  
TD 100  
SFO1 125.771 MHz  
F4DRS 264.119080 Hz  
SFO2 210.00 PPM  
FMODE  
SI 2048  
SF 500.1300000 MHz  
SINE  
LB 0.00 Hz  
GB 0.00 Hz  
PC 1.40  
MC1 1024  
MC2  
SF 125.7577890 MHz  
SINE  
LB 0.00 Hz  
GB 0.00 Hz

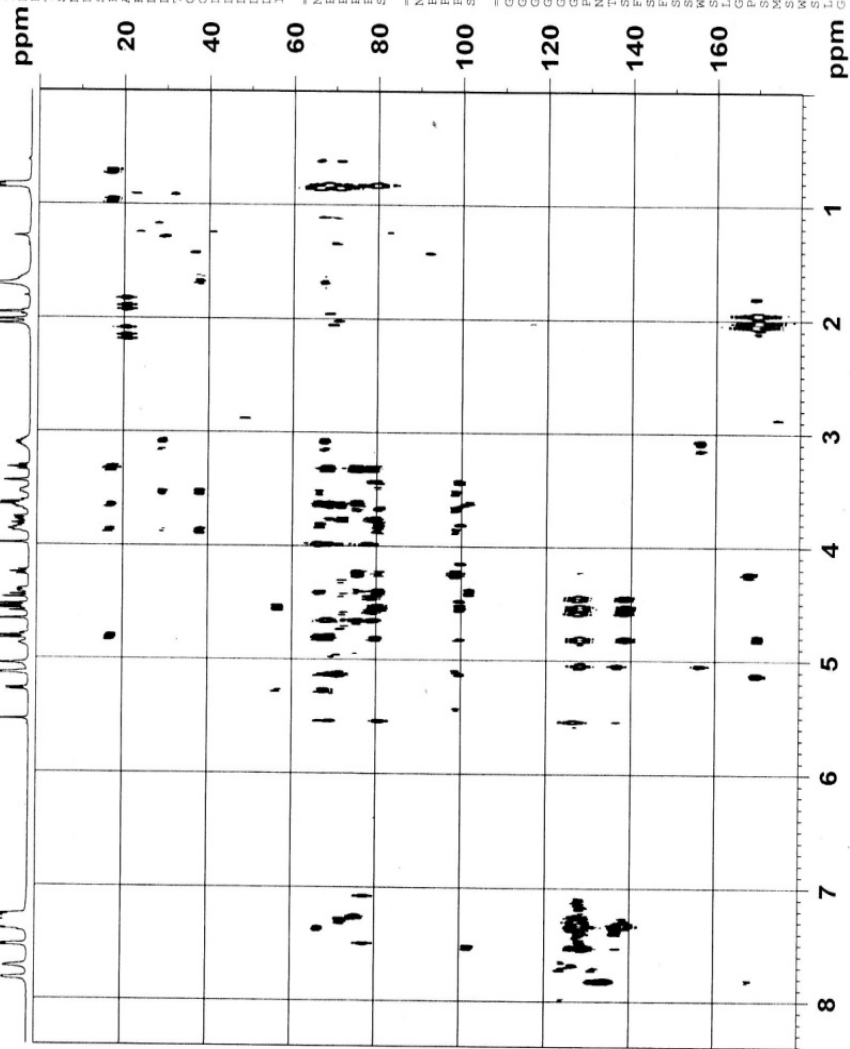



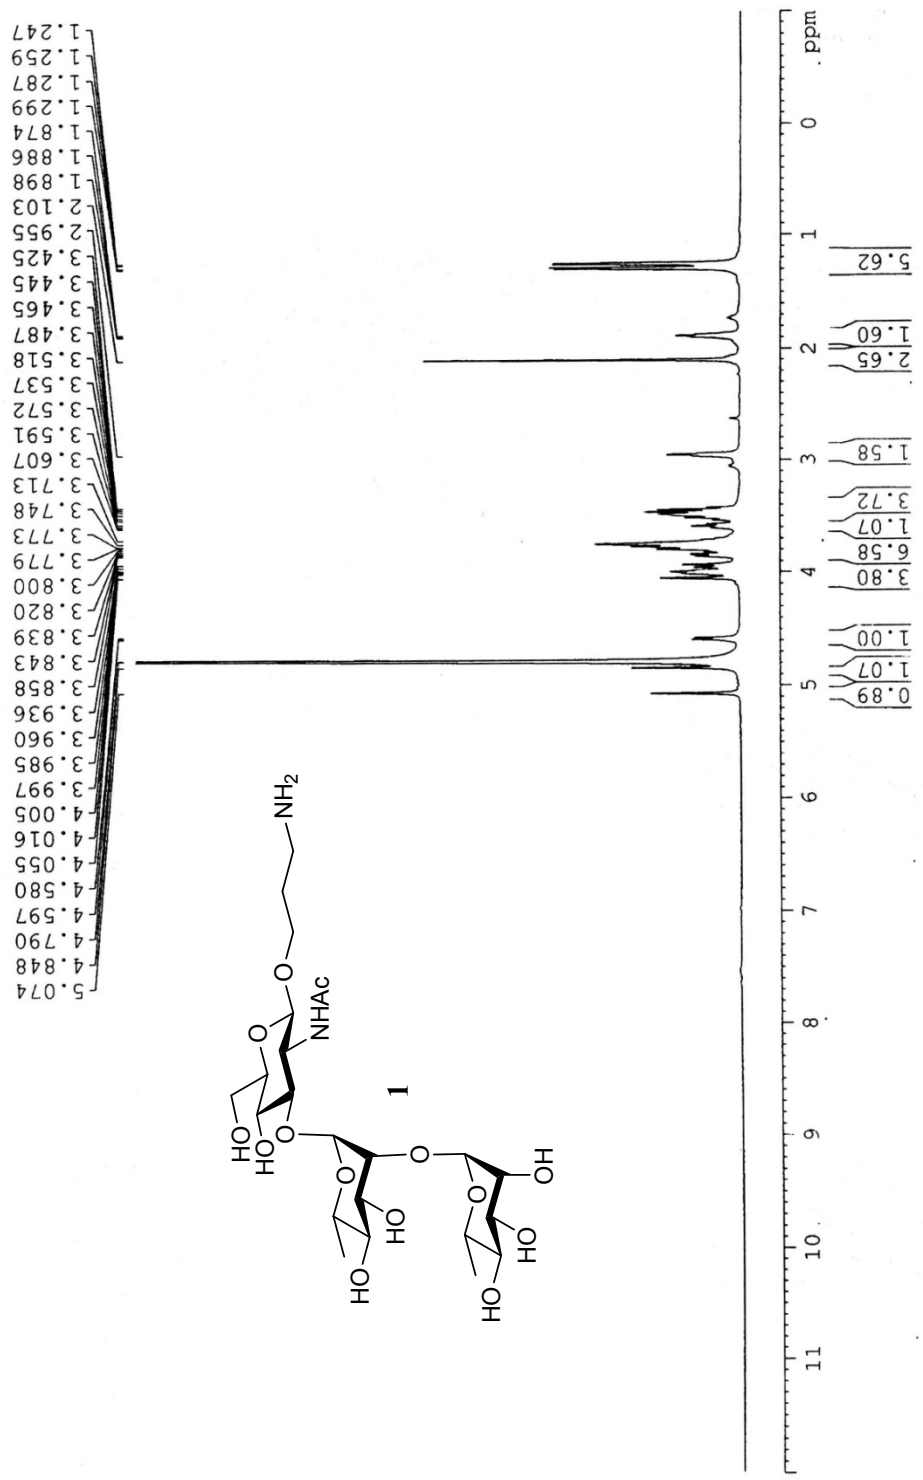

Current Data Parameters  
 NAME R610-08171-13C  
 EXPNO 1  
 PROCNO 1

F2 - Acquisition Parameters  
 Date\_ 20140303  
 Time 17.05  
 INSTRUM av300  
 PULPROG zgpg30  
 TD 65536  
 SOLVENT D2O  
 NS 16570  
 DS 4  
 SWH 16556.291 Hz  
 FIDRES 0.25629 Hz  
 AQ 1.979232 sec  
 RG 32768  
 DM 30.200 usec  
 DE 6.00 usec  
 TE 0.0 K  
 D1 2.0000000 sec  
 d11 0.0300000 sec  
 DELTA 1.6999998 sec  
 ACQRES 0.0000000 sec  
 NUCMRK 0.01500000 sec

\*\*\*\*\* CHANNEL f1 \*\*\*\*\*  
 NUC1 13C  
 P1 11.00 usec  
 PL1 -1.00 dB  
 SF01 75.4752568 MHz

\*\*\*\*\* CHANNEL f2 \*\*\*\*\*  
 CPDPRG2 waltz16  
 NUC2 1H  
 P2 80.00 usec  
 PL2 -2.00 dB  
 PL12 13.00 dB  
 PL13 17.00 dB  
 SF02 300.1312005 MHz

F2 - Processing parameters  
 SI 32768  
 SF 75.4677460 MHz  
 WDM EM  
 SSB 0  
 LB 1.00 Hz  
 GB 0  
 PC 1.40

1D NMR plot parameters  
 CX 25.00 cm  
 CY 7.00 cm  
 F1 209.681000 MHz  
 F2 16924.62 Hz  
 F20 -9.681000 MHz  
 F22 -731.37 Hz  
 SFOCM 8.73520 ppm/  
 A2CM 662.25165 Hz/CI

102.726  
100.450  
99.679  
81.410  
80.424  
75.914  
72.144  
72.094  
70.125  
69.773  
69.090  
68.961  
68.606  
67.671  
60.727  
55.578  
37.472  
26.769  
23.095  
22.468  
16.960  
16.534

174.567

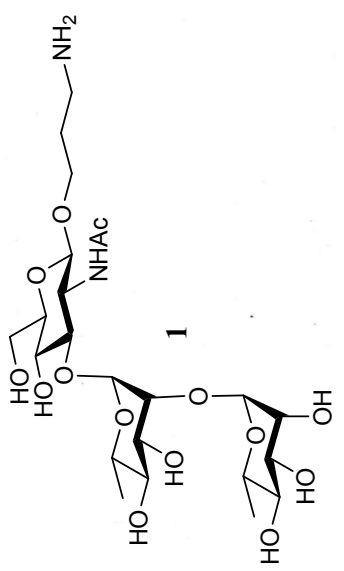

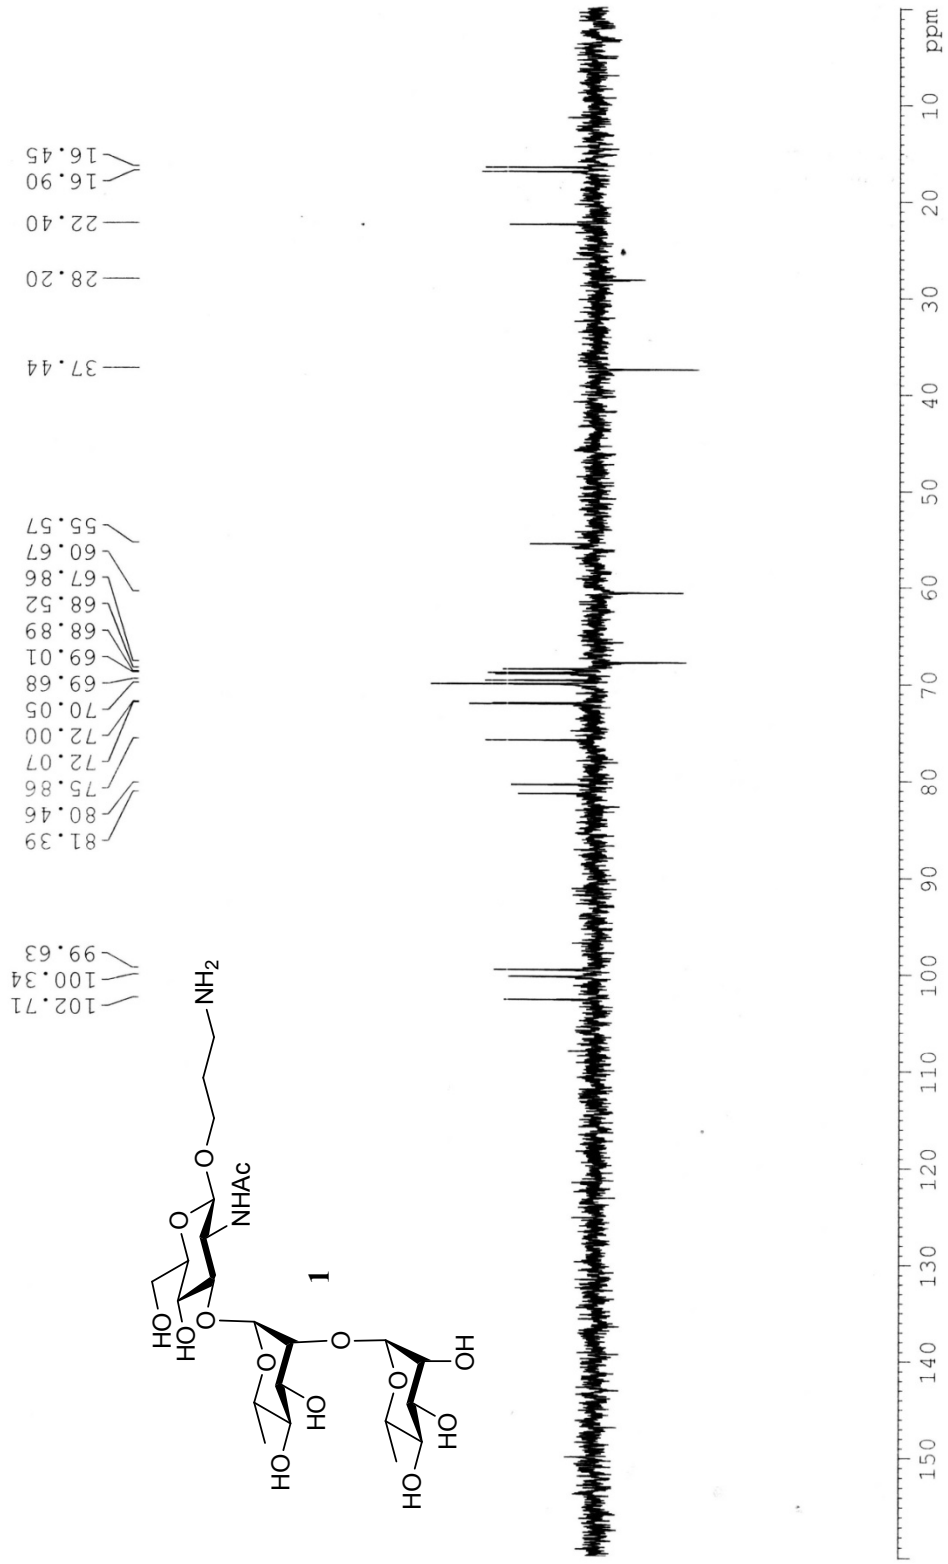

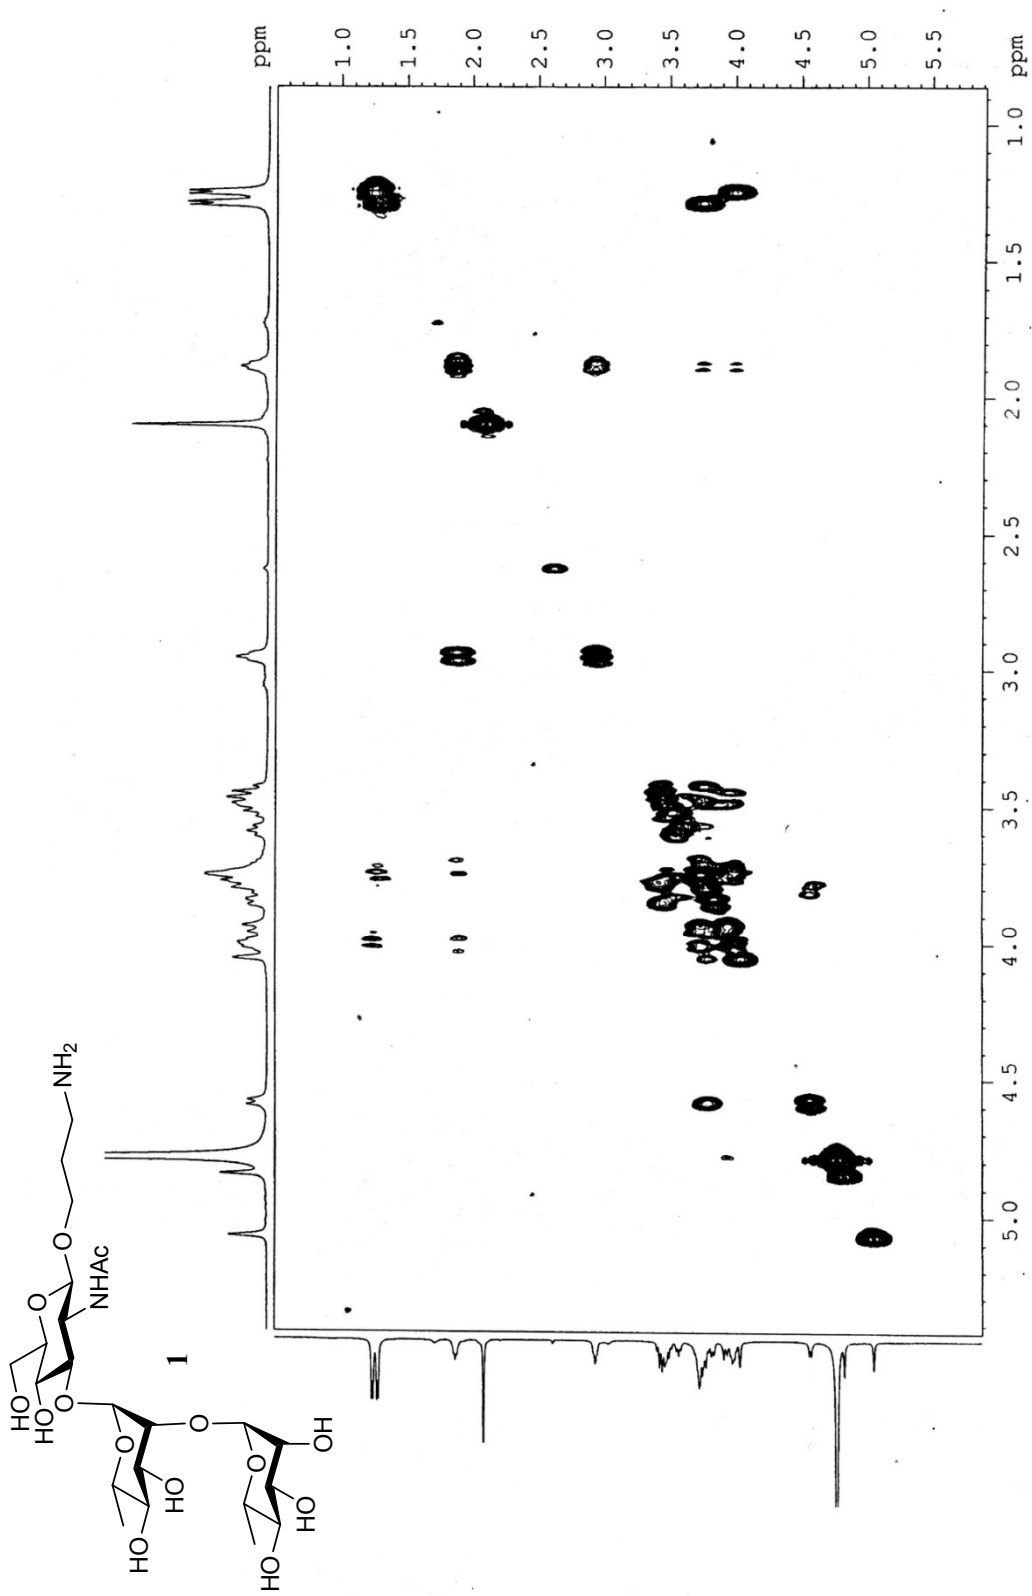

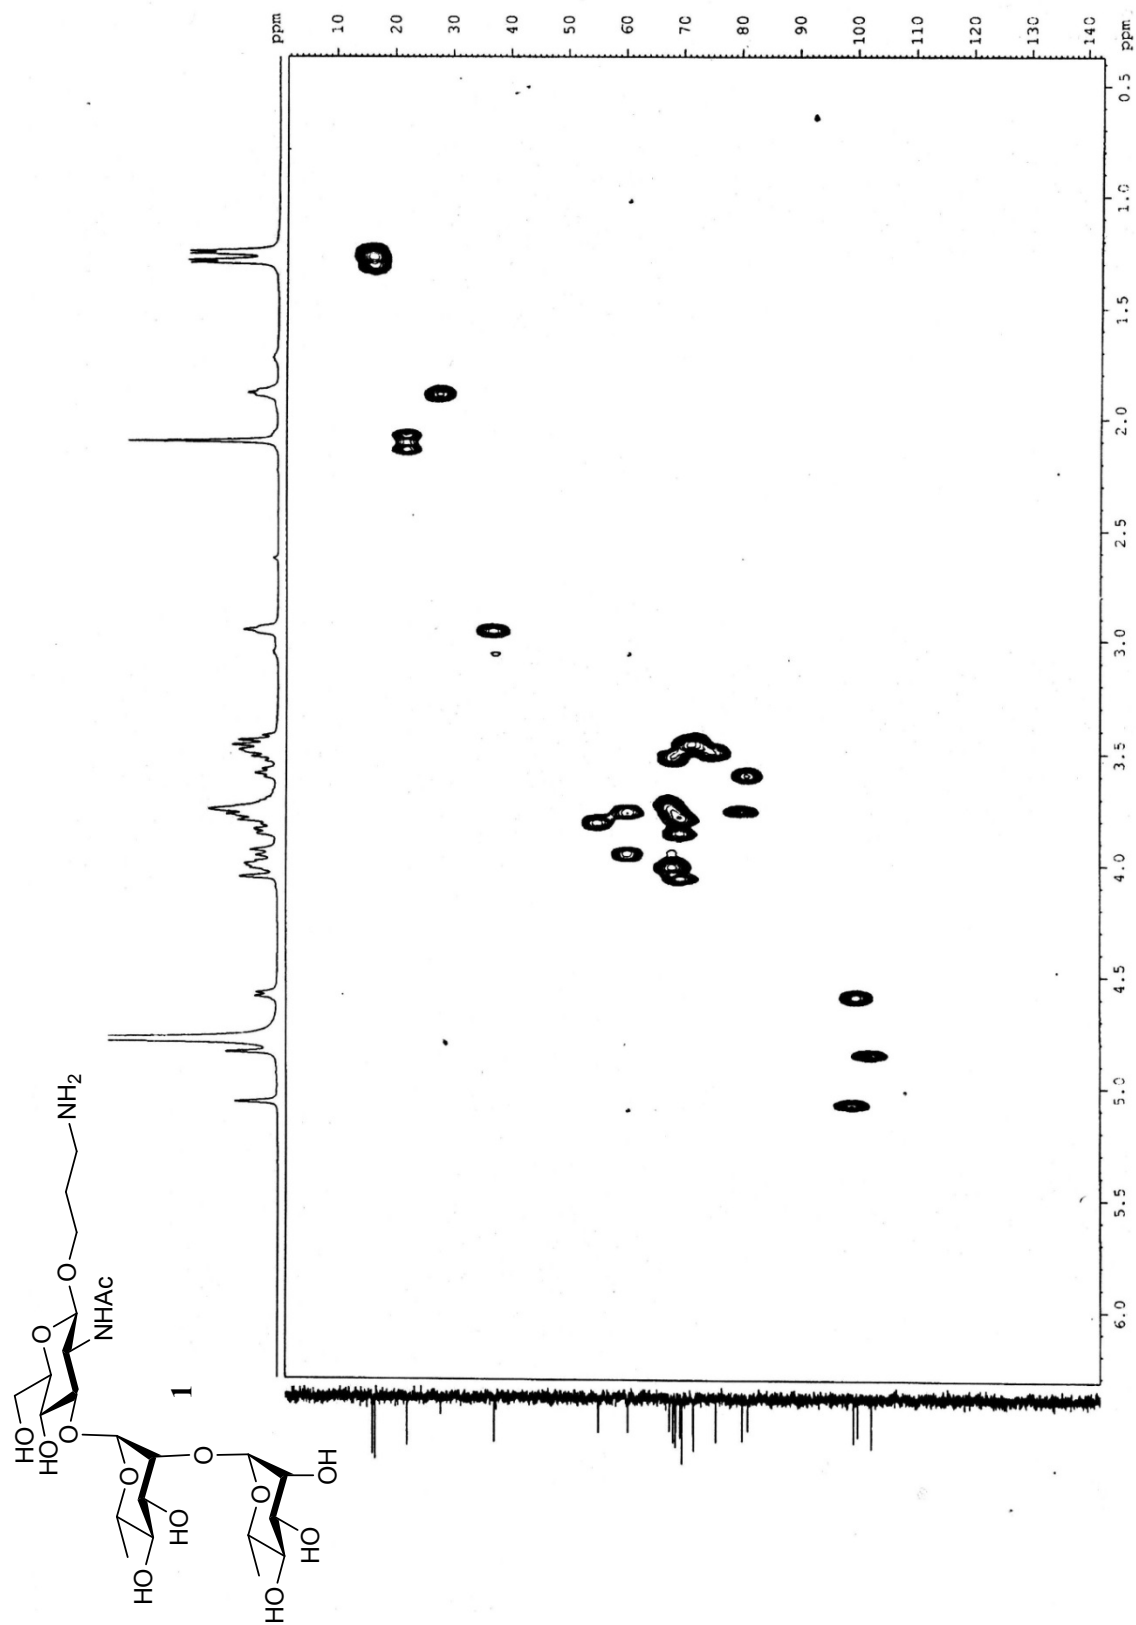

Supplement: c4ra03954h1.pdf [file c4ra03954h1.pdf]
